# Supplementary material
Source: PubMed Central journal article supplement (PMC3358106)
Supplement: Supp_Data.pdf [file Supp_Data.pdf]

## Supplementary Data

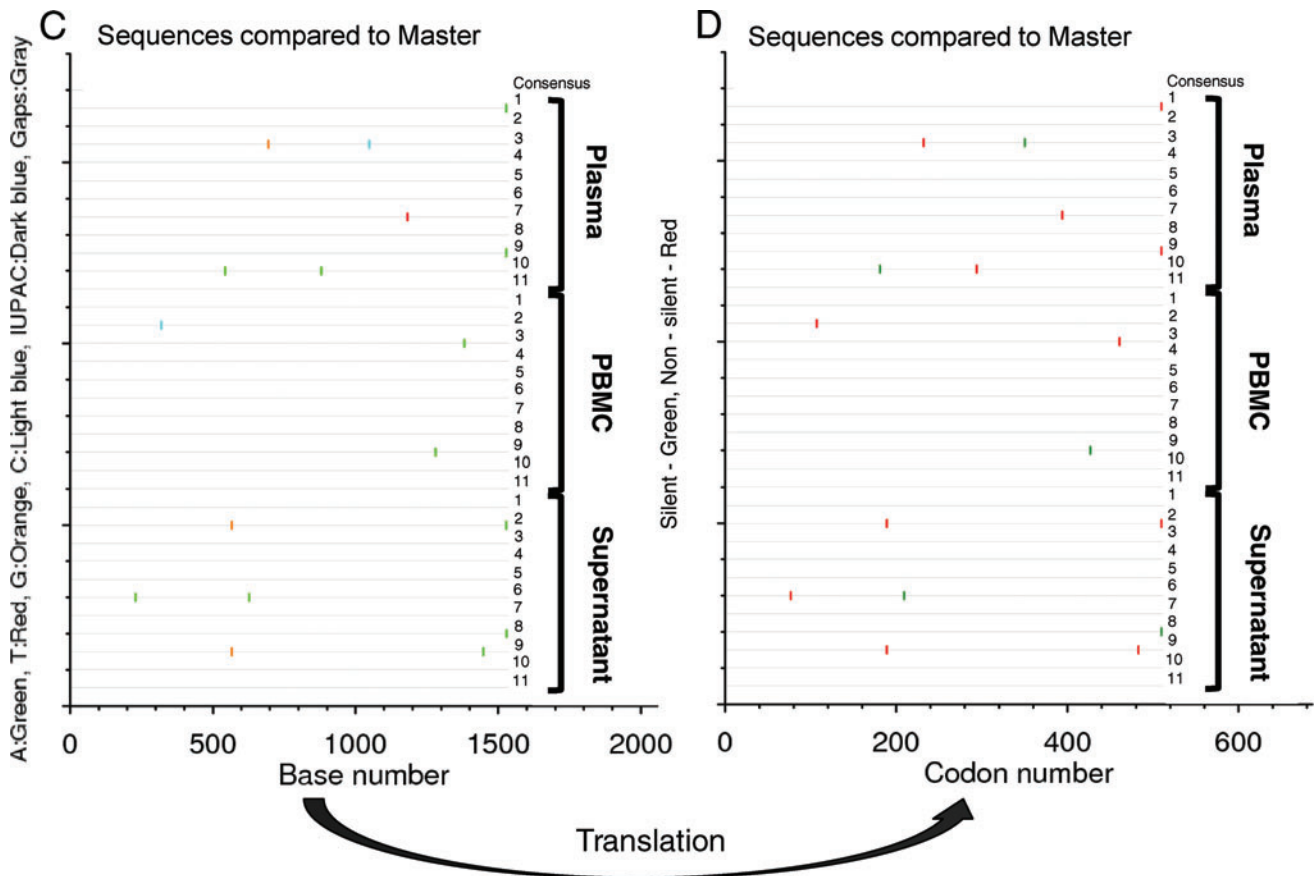

**SUPPLEMENTARY FIG. S3A.** Comparison of viral sequences from plasma and derived cultured virus from a Fiebig Stage V virus isolate (BP00008) from South Africa. The envelope sequence analysis of original plasma and virus cultures from supernatant or PBMC of original isolate as described in Figure 2 was carried out on 10–12 separate sequences of the respective virus preparations. Point mutations in each sequence are designated by a colored marker to indicate specific mutation type (Panel A). The observed mismatches mostly led to codon changes (Panel B).

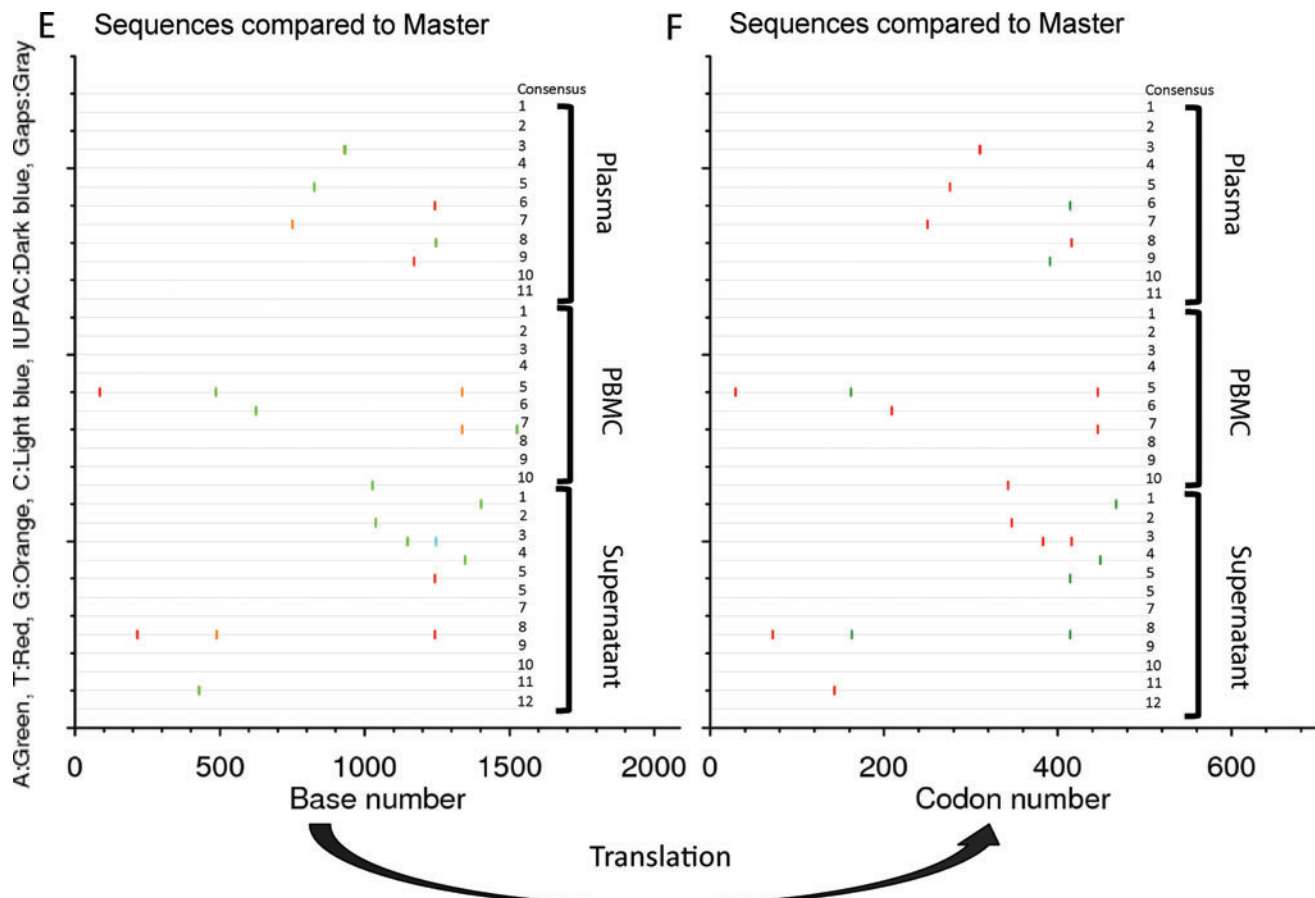

**SUPPLEMENTARY FIG. S3B. Comparison of viral sequences from plasma and derived cultured virus from a Fiebig Stage V virus isolate (BP00067) from the United States.** The envelope sequence analysis of original plasma and virus cultures from supernatant or PBMC of original isolate as described in Figure 2 was carried out on 10–12 separate sequences of the respective virus preparations. Point mutations in each sequence are designated by a colored marker to indicate specific mutation type (Panel A). The observed mismatches mostly led to codon changes (Panel B).
